# Supplementary material for: Gene expression patterns in shoots of Camelina sativa with enhanced salinity tolerance provided by plant growth promoting bacteria producing 1-aminocyclopropane-1-carboxylate deaminase or expression of the corresponding acdS gene
Source: PubMed Central journal article supplement (PMC7895925; doi:10.1038/s41598-021-83629-8), 2021-02-19

**Supplemental Figure 1.** Expression of select *C. sativa* genes after salt stress (15 dSm<sup>-1</sup>) as determined by RNA-Seq and droplet digital PCR (dd PCR) analysis. Plots show expression (fold change) in control (wild type DH55) plus salt, *35S::acdS* and *rolD::acdS* transgenic lines or after treatment with the plant growth promoting bacterium *P. migulae* 8R6 relative to the control without salt (set at 1.0) and are reported as means and standard errors of three biological replicates.

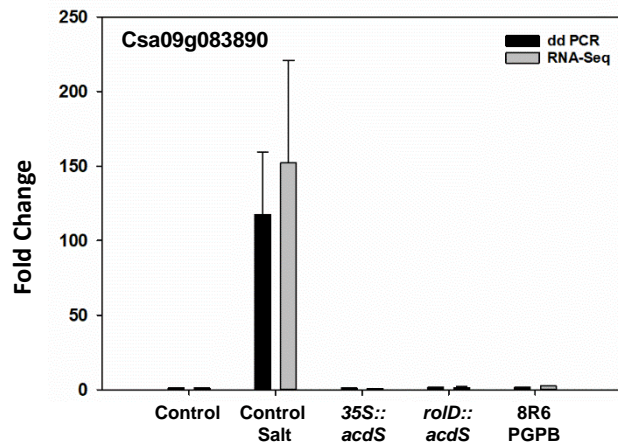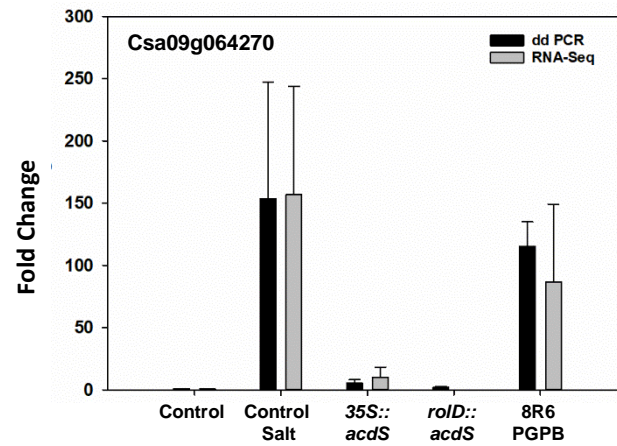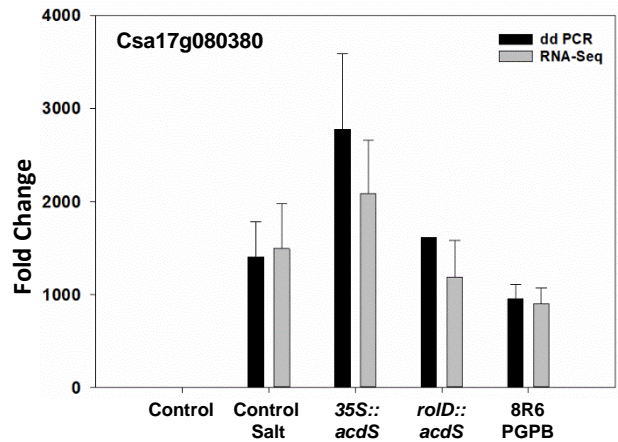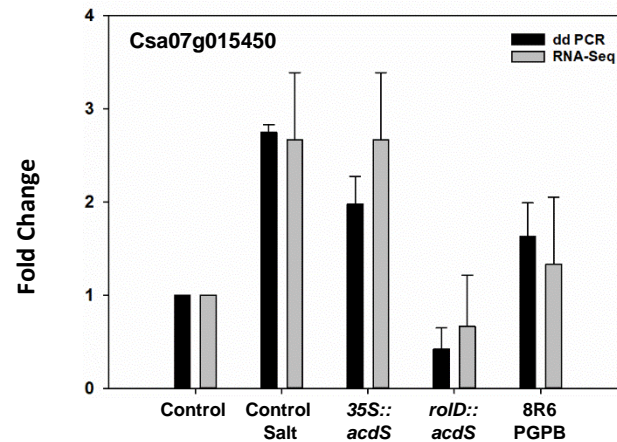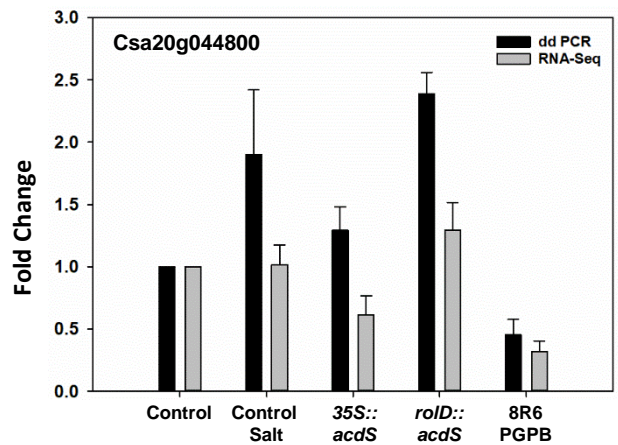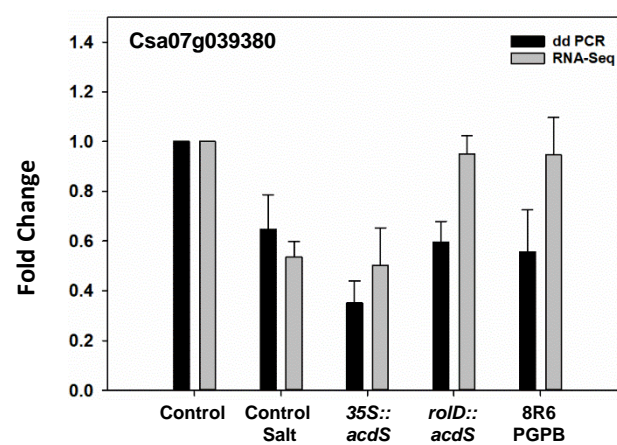

Supplement: 41598_2021_83629_MOESM3_ESM.pdf [file 41598_2021_83629_MOESM3_ESM.pdf]
