# Supplementary material for: Gene expression patterns in shoots of Camelina sativa with enhanced salinity tolerance provided by plant growth promoting bacteria producing 1-aminocyclopropane-1-carboxylate deaminase or expression of the corresponding acdS gene
Source: PubMed Central journal article supplement (PMC7895925; doi:10.1038/s41598-021-83629-8), 2021-02-19

**Supplemental Figure 2.** MAPMAN pathways showing categories of genes that were differentially-expressed in *C. sativa* grown in soil treated with *P. migulae* 8R6 or transgenic lines expressing *acdS* under the control of the *35S* or *rolD* promoters relative to the wild type line under salt stress. Output from MAPMAN software version 3.5.1R2 (<http://mapman.gabipd.org/>).

# Regulation

*8R6-PGPB*

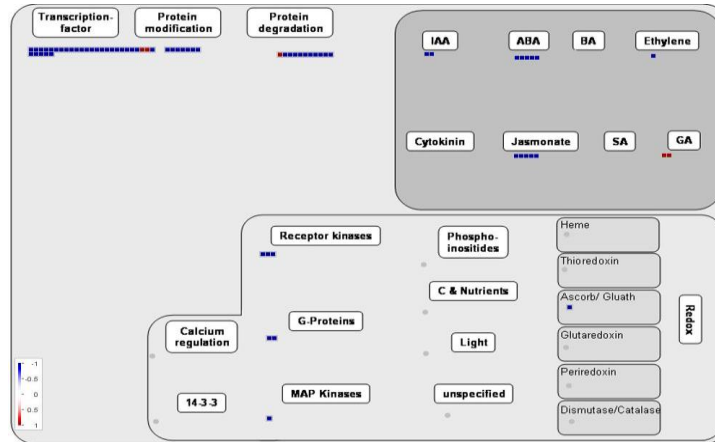

*35S::acdS*

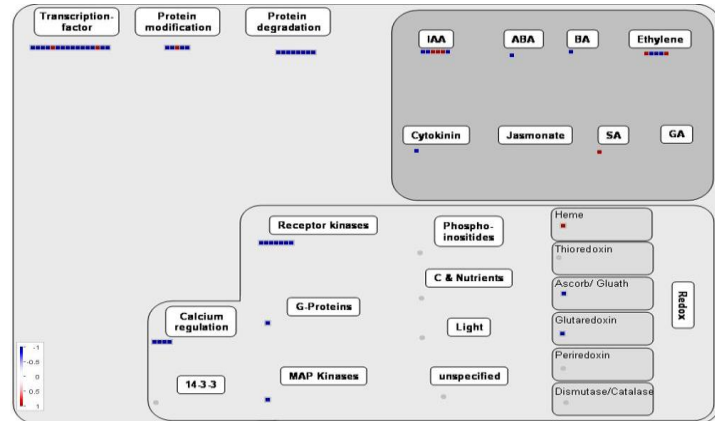

*rolD::acdS*

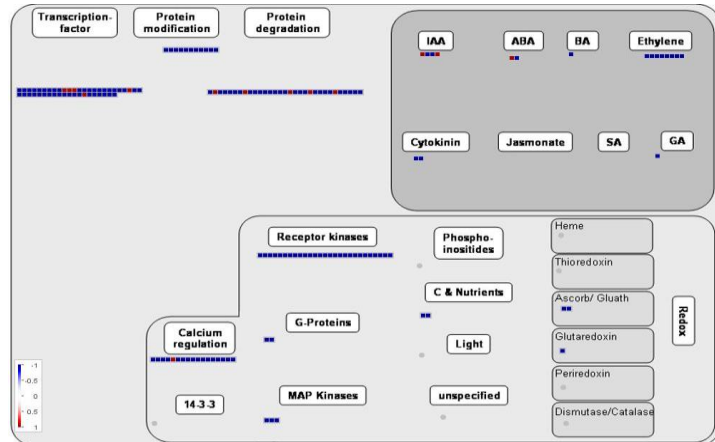

# Biotic Stress Response

**8R6-PGPB**

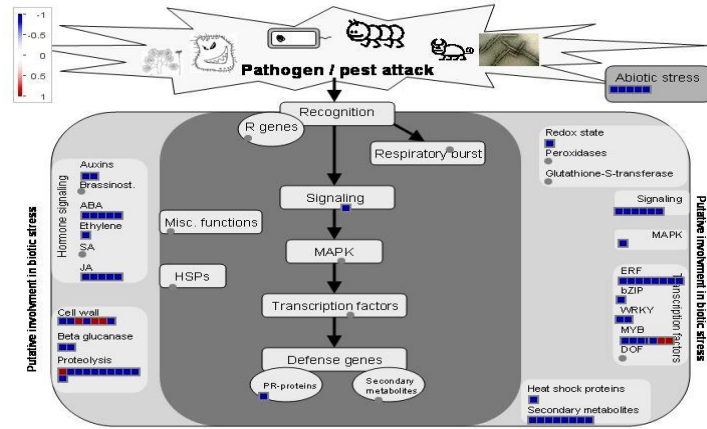

**35S::acdS**

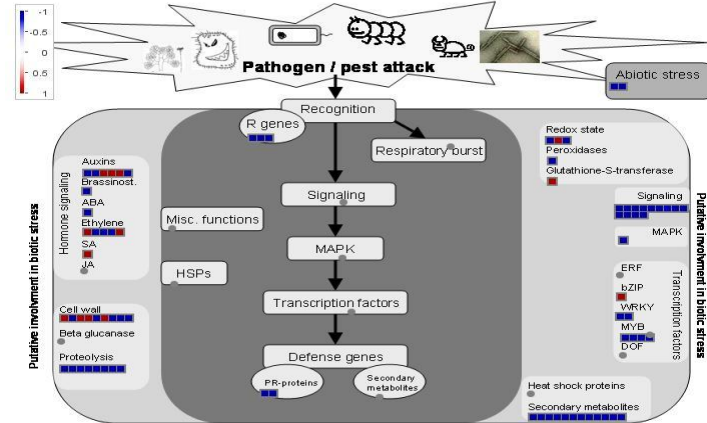

**rolD::acdS**

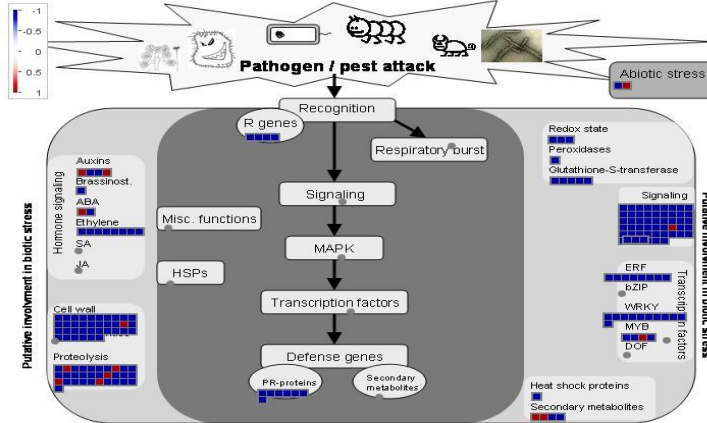

# Metabolism

**8R6-PGPB**

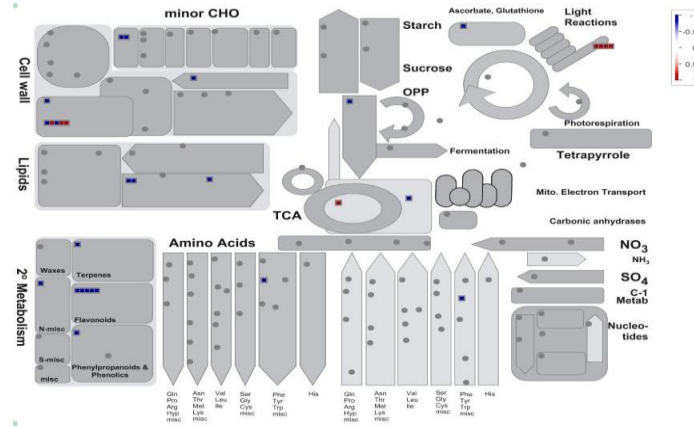

**35S::acdS**

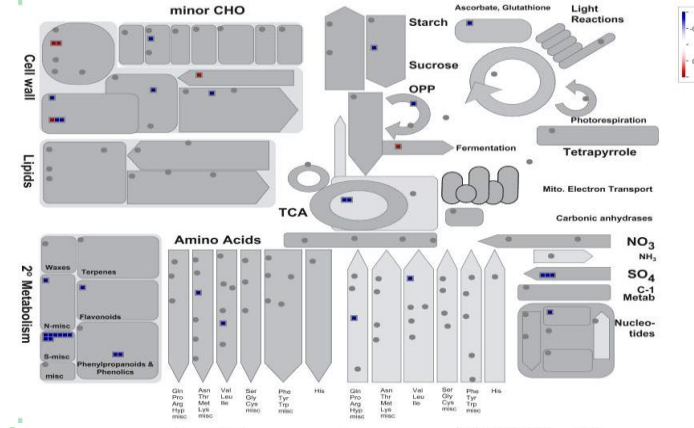

**rolD::acdS**

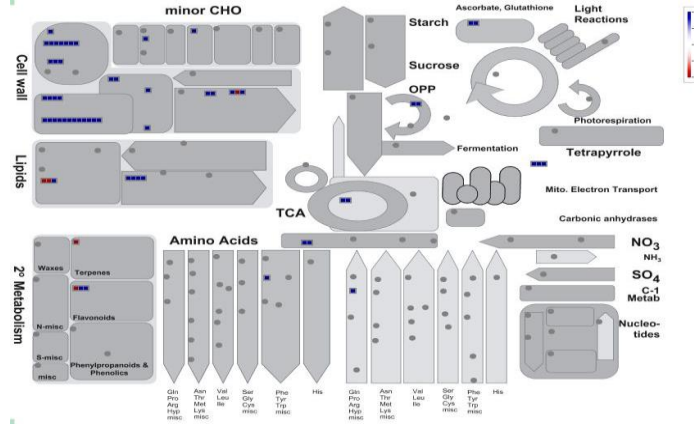

Supplement: 41598_2021_83629_MOESM4_ESM.pdf [file 41598_2021_83629_MOESM4_ESM.pdf]
