# Supplementary material for: Gene expression patterns in shoots of Camelina sativa with enhanced salinity tolerance provided by plant growth promoting bacteria producing 1-aminocyclopropane-1-carboxylate deaminase or expression of the corresponding acdS gene
Source: PubMed Central journal article supplement (PMC7895925; doi:10.1038/s41598-021-83629-8), 2021-02-19
Supplement: 41598_2021_83629_MOESM5_ESM.pdf [file 41598_2021_83629_MOESM5_ESM.pdf]

### **Supplemental Figure 3.**

Cluster analysis of common differentially-expression genes in vegetative tissue from *C. sativa* lines expressing *acdS* under the control of the *rolD* promoter or the constitutive *CaMV 35S* promoter, or from plants grown in soil treated with *P. migulae 8R6* in the presence of salt (NaCl, 15 dSm<sup>-1</sup>). Cluster analysis done using JMP software version 15.

Csa14g008830  
 Csa16g052190  
 Csa07g061520  
 Csa09g068130  
 Csa03g037500  
 Csa16g044610  
 Csa04g033670  
 Csa09g050610  
 Csa08g022350  
 Csa12g081170  
 Csa18g037380  
 Csa02g071910  
 Csa06g022330  
 Csa11g100390  
 Csa11g004480  
 Csa13g003140  
 Csa17g043100  
 Csa09g005240  
 Csa07g037510  
 Csa16g032240  
 Csa18g022950  
 Csa02g062060  
 Csa01g018090  
 Csa17g010800  
 Csa03g060000  
 Csa03g031680  
 Csa20g080750  
 Csa19g022270  
 Csa05g048280  
 Csa07g011930  
 Csa12g013540  
 Csa20g078090  
 Csa19g023590  
 Csa05g072080  
 Csa19g010980  
 Csa07g015450  
 Csa09g083890  
 Csa16g037870  
 Csa09g066180  
 Csa18g023850  
 Csa12g034240  
 Csa11g023650  
 Csa14g006280  
 Csa07g046140  
 Csa16g055860  
 Csa18g009520  
 Csa03g009130  
 Csa02g041670  
 Csa16g036240  
 Csa18g039560  
 Csa17g039370  
 Csa04g043100  
 Csa10g013910  
 Csa11g022970  
 Csa10g012230  
 Csa16g038950  
 Csa06g011430  
 Csa12g036930  
 Csa08g005200  
 Csa06g047060  
 Csa11g010780  
 Csa15g016670  
 Csa09g071680  
 Csa09g079290  
 Csa17g021110  
 Csa19g033370  
 Csa04g030360  
 Csa02g032160  
 Csa11g070410  
 Csa02g046650  
 Csa07g049730  
 Csa09g075750  
 Csa20g081680  
 Csa17g008290  
 Csa10g001780  
 Csa06g050730  
 Csa03g031830  
 Csa02g012680  
 Csa19g057770  
 Csa05g016400  
 Csa05g003440  
 Csa19g033190  
 Csa13g049080  
 Csa09g097880  
 Csa17g092270  
 Csa04g040640  
 Csa17g092940  
 Csa11g001970  
 Csa11g093220  
 Csa19g039210  
 Csa06g052240  
 Csa20g054140  
 Csa01g034630  
 Csa07g005230  
 Csa07g056440  
 Csa09g078390  
 Csa08g010310  
 Csa11g071270  
 Csa01g031300  
 Csa06g011420  
 Csa14g002570  
 Csa05g092210  
 Csa15g053010  
 Csa15g076700  
 Csa10g019870  
 Csa07g004630  
 Csa16g005860  
 Csa09g053420  
 Csa14g001480  
 Csa11g090460  
 Csa20g039290  
 Csa05g003450  
 Csa04g049470  
 Csa17g057000  
 Csa09g064270  
 Csa08g043920  
 Csa10g046890  
 Csa06g038370  
 Csa12g046830  
 Csa11g074000  
 Csa12g002890  
 Csa04g052680  
 Csa12g033490  
 Csa05g015040  
 Csa01g016400  
 Csa01g006800  
 Csa05g018080  
 Csa17g009290  
 Csa02g062860  
 Csa03g007320  
 Csa01g034720  
 Csa00g04s010  
 Csa11g018190  
 Csa11g026230  
 Csa16g037660  
 Csa10g016710  
 Csa08g005090  
 Csa11g032780  
 Csa16g036620  
 Csa01g044320  
 Csa17g079120  
 Csa17g025050  
 Csa04g022520  
 Csa11g055690  
 Csa07g053310  
 Csa13g028530  
 Csa17g014770  
 Csa05g009110  
 Csa02g073920  
 Csa06g011400  
 Csa14g007270  
 Csa17g002150  
 Csa02g076290  
 Csa05g087560  
 Csa20g013070

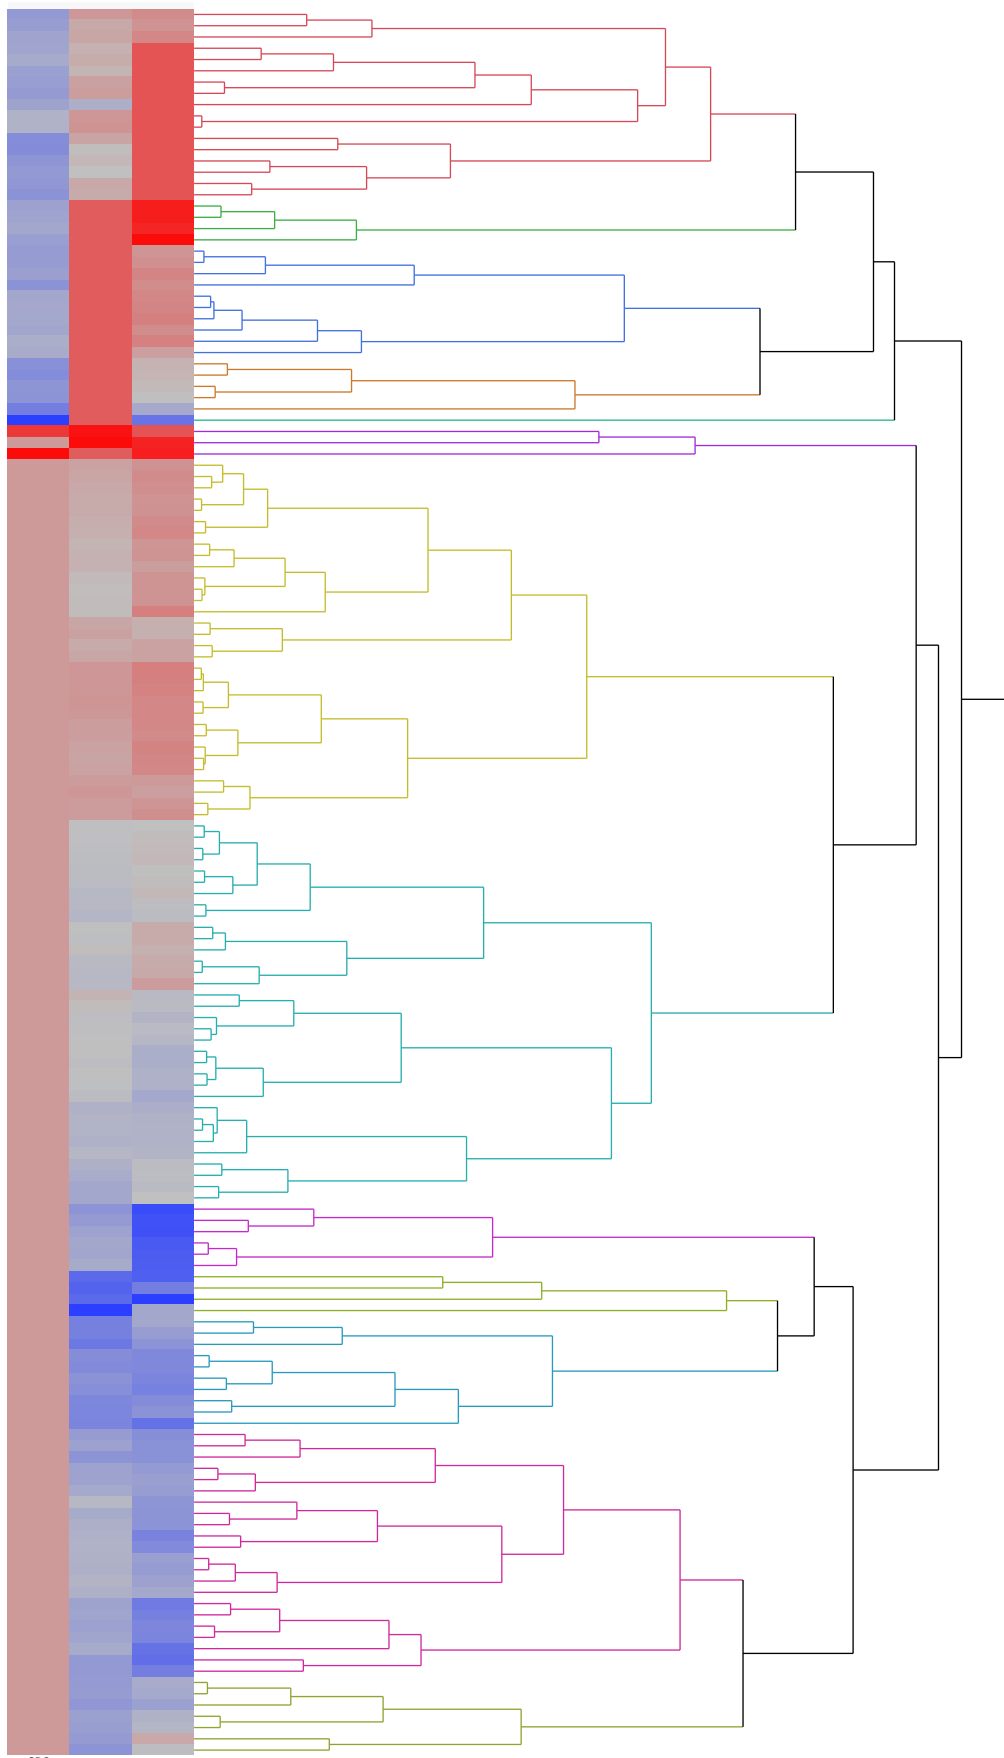

| 8R6    | rold::acdS | 35S::acdS |
|--------|------------|-----------|
| -5.02  | -7.29      | -5.37     |
| -4.095 | -6.316     | -4.636    |
| -3.17  | -5.342     | -3.901    |
| -2.245 | -4.368     | -3.167    |
| -1.32  | -3.393     | -2.433    |
| -0.395 | -2.419     | -1.699    |
| -0.03  | -1.607     | -1.085    |
| 0.3348 | -0.796     | -0.471    |
| 0.6999 | 0.0163     | 0.1425    |
| 1.0649 | 0.8282     | 0.7563    |
| 1.43   | 1.64       | 1.37      |

8R6    35S::acdS    rold::acdS
